# Supplementary figures and images for: High Homogeneity of Mesothelin Expression in Primary and Metastatic Ovarian Cancer
Source: PubMed Central journal article supplement — Appl Immunohistochem Mol Morphol. 2023 Jan 9;31(2):77–83. doi: 10.1097/PAI.0000000000001097 (PMC9928564; doi:10.1097/pai.0000000000001097), 2023-01-09

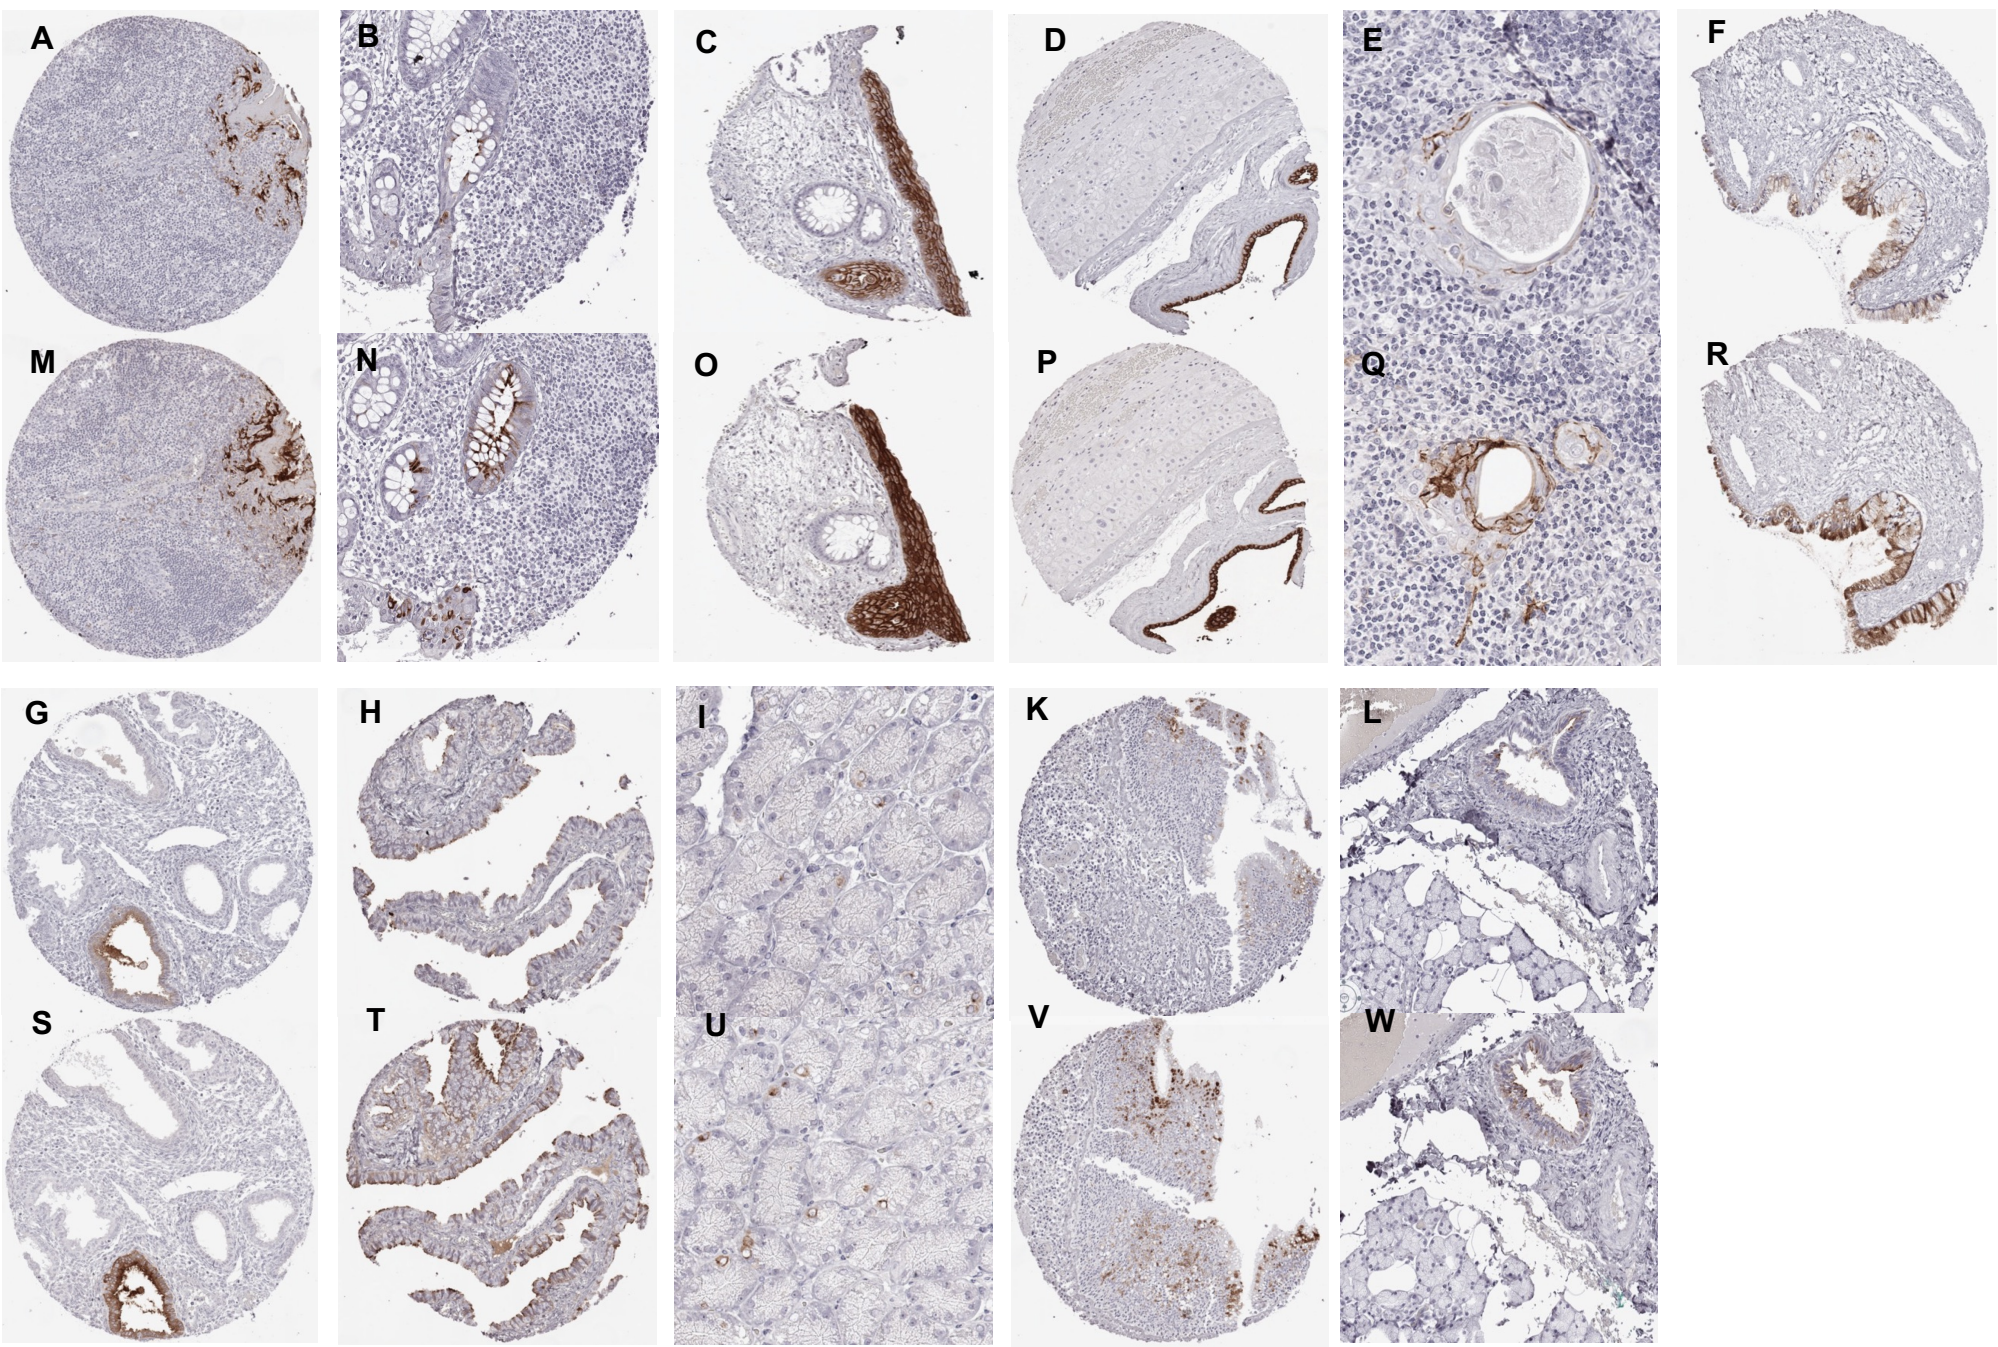

Supplement: pai-31-77-s002.pdf [file pai-31-77-s002.pdf]

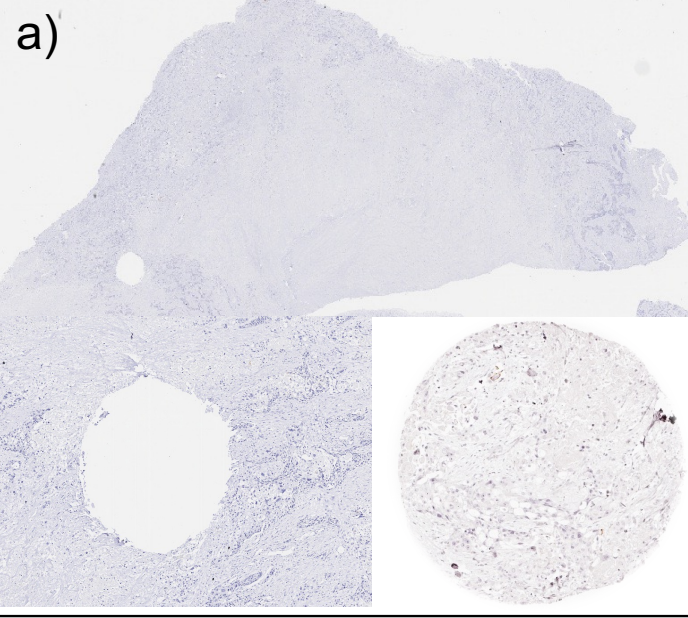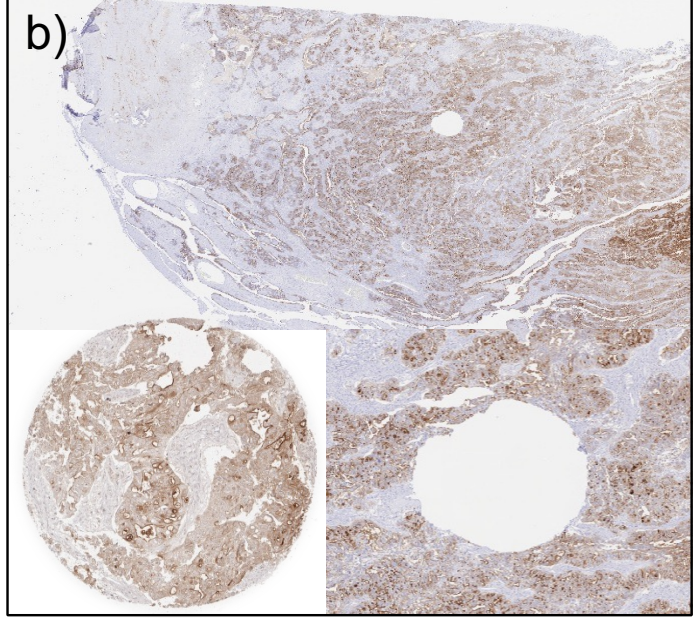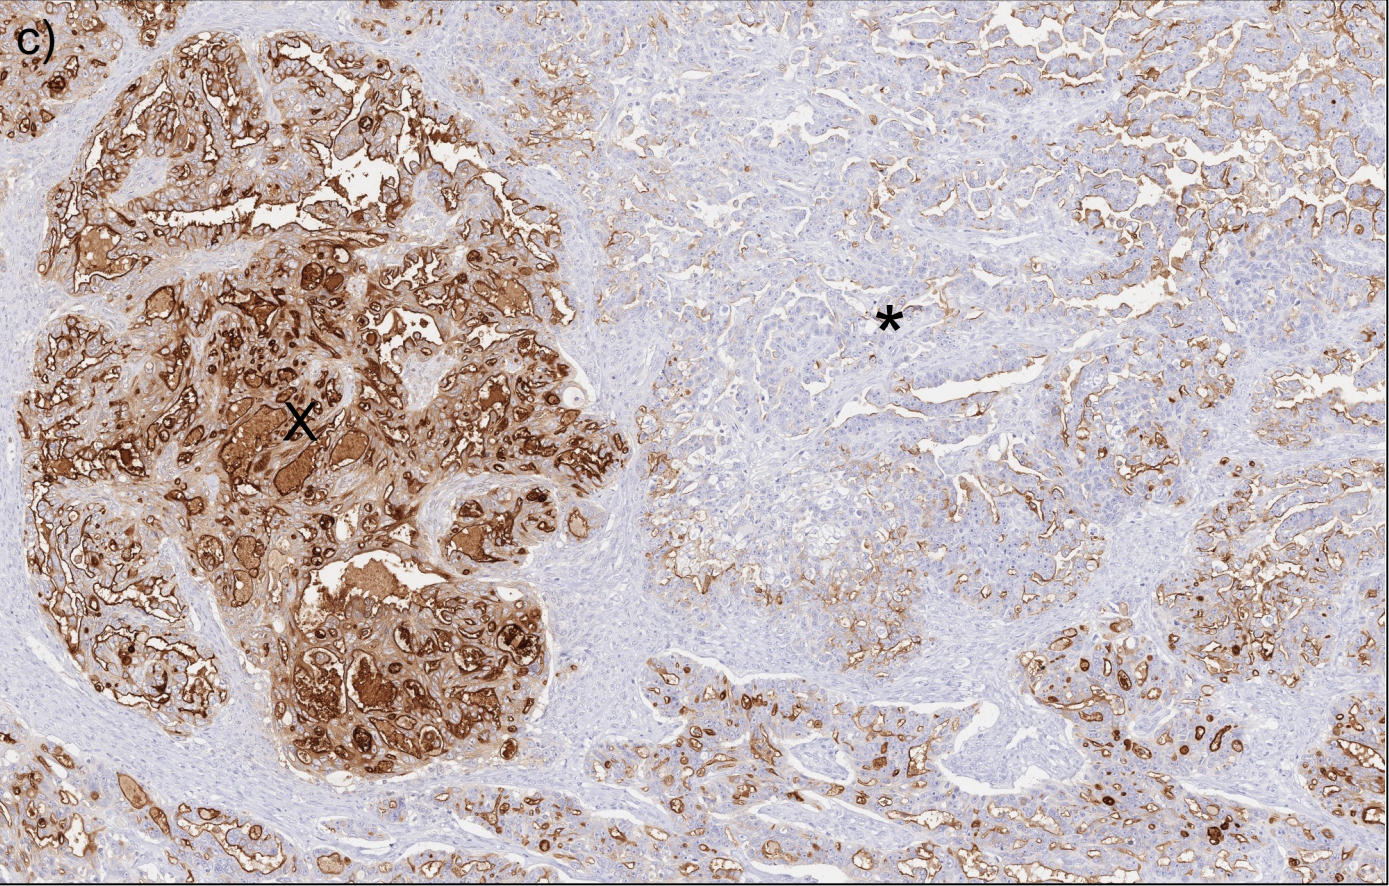

Supplement: pai-31-77-s004.pdf [file pai-31-77-s004.pdf]
